# Supplementary material for: Safety and Efficacy of Flexible-Dose Deutetrabenazine in Children and Adolescents With Tourette Syndrome: A Randomized Clinical Trial
Source: PubMed Central journal article supplement — JAMA Netw Open. 2021 Oct 5;4(10):e2128204. doi: 10.1001/jamanetworkopen.2021.28204 (PMC8493441; doi:10.1001/jamanetworkopen.2021.28204), 2021-10-05
Supplement: jamanetwopen-e2128204-s003.pdf [file jamanetwopen-e2128204-s003.pdf]

## Data Sharing Statement

Jankovic. Safety and Efficacy of Flexible-Dose Deutetrabenazine in Children and Adolescents With Tourette Syndrome. *JAMA Netw Open*. Published October 05, 2021.

doi:10.1001/jamanetworkopen.2021.28204

### Data

**Data available:** No

### Additional Information

**Explanation for why data not available:** • All data that will be made available: Deidentified participant data • Email address for data requests: [USMedInfo@tevapharm.com](mailto:USMedInfo@tevapharm.com) • Other (please specify): We share a redacted protocol if requested
